# Supplementary material
Source: publisher site journal article supplement (https://www.dovepress.com/article/433057)
Supplement: Supplementary file 1 [file get_supplementary_file.php]

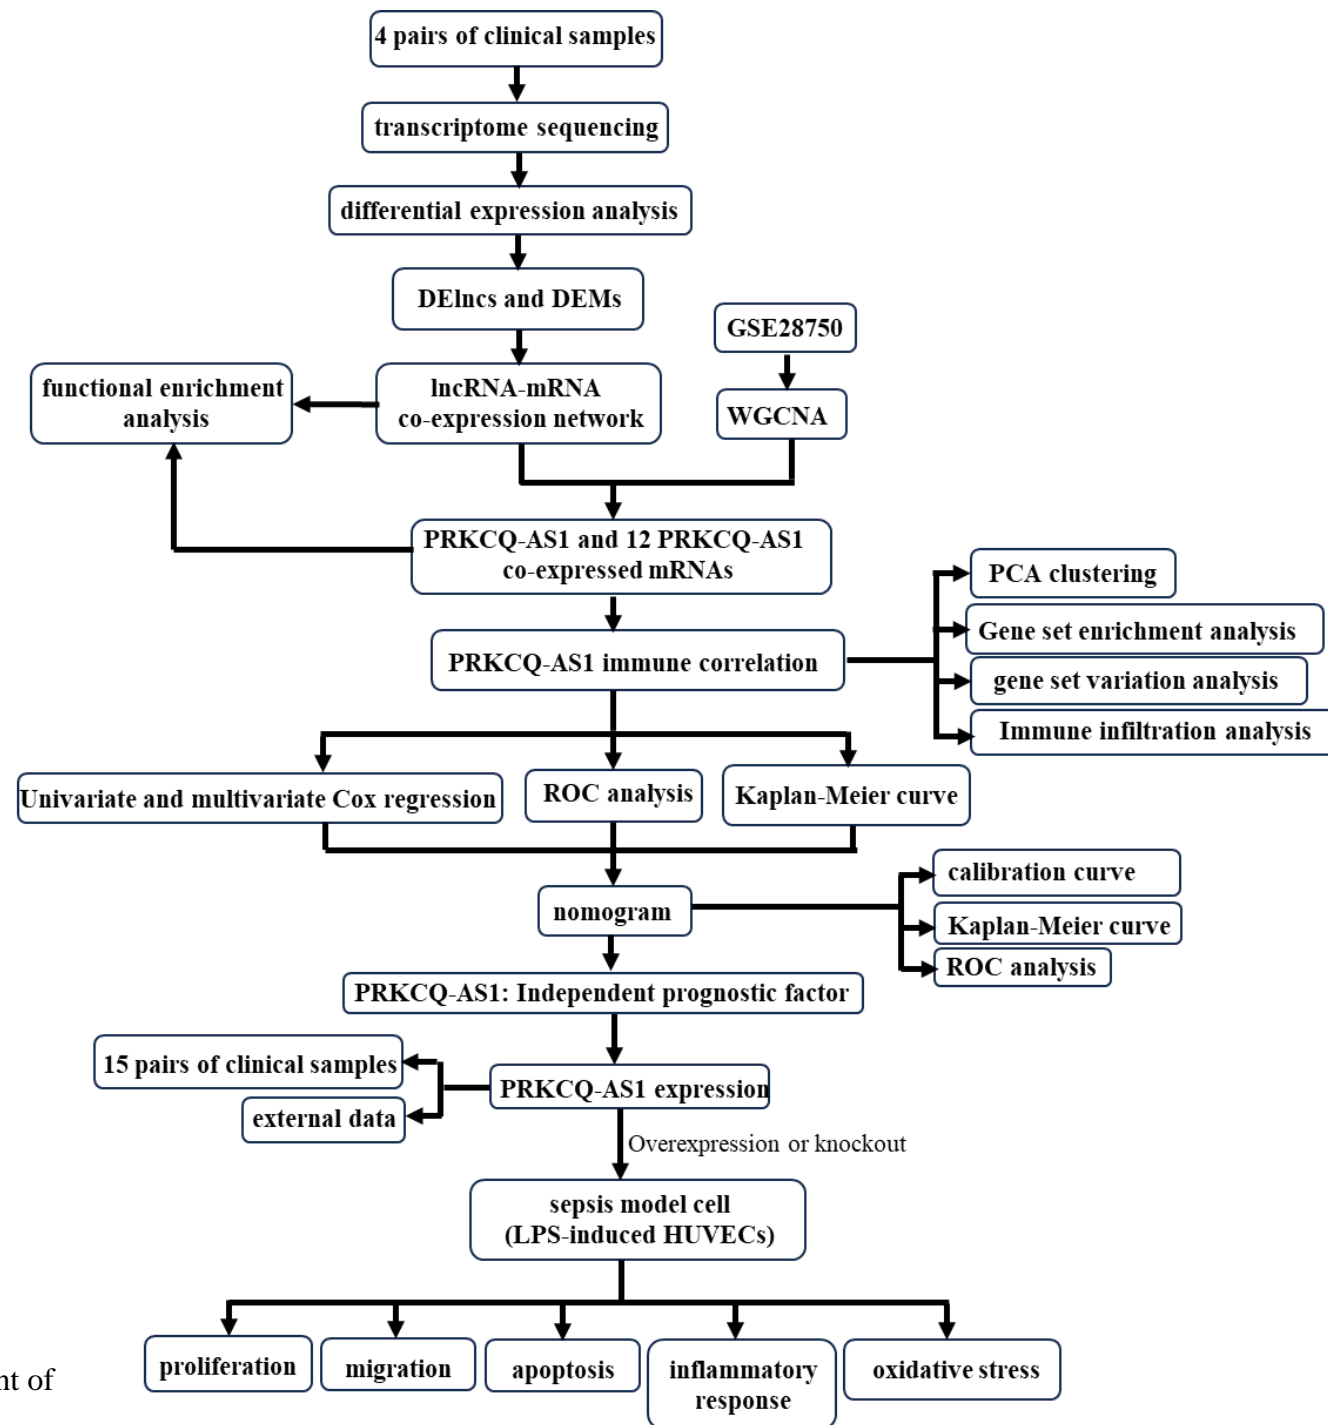

**Figure S1:** the flow chart of the research content of this

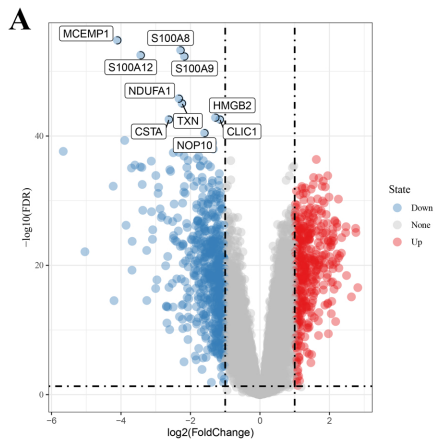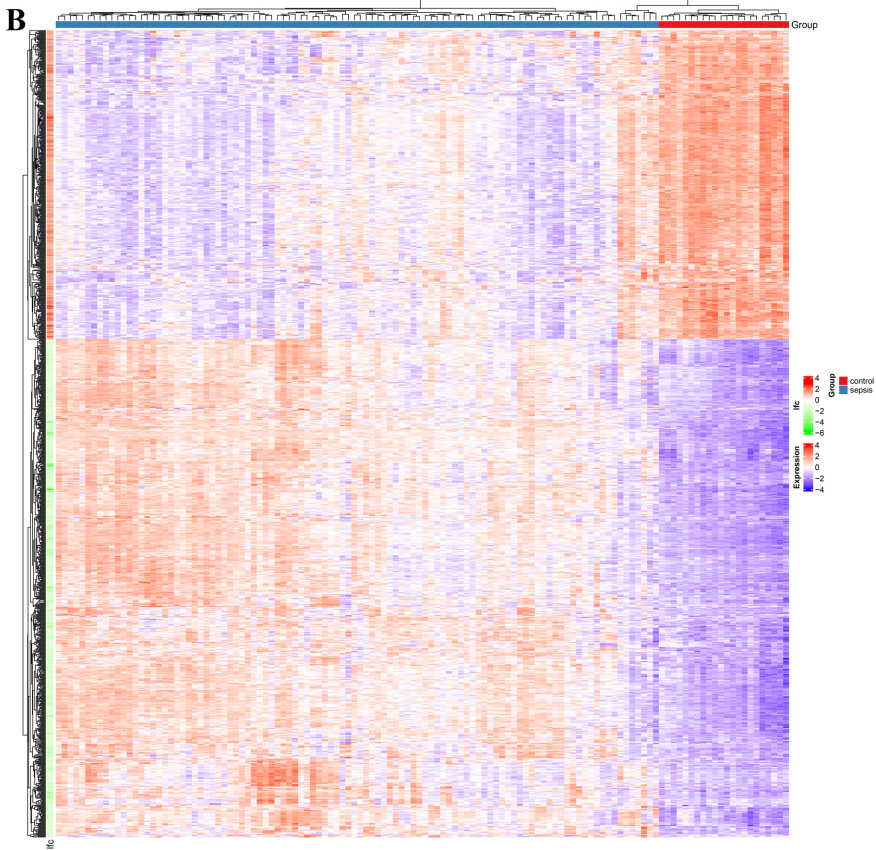

**Figure S2.** Differential expression of lncRNAs in GSE95223. A: Volcano plot shows the differential expression of lncRNAs between sepsis group and control group in GSE95223. B: Heat map shows the differential expression of lncRNAs between sepsis group and control group in GSE95223.

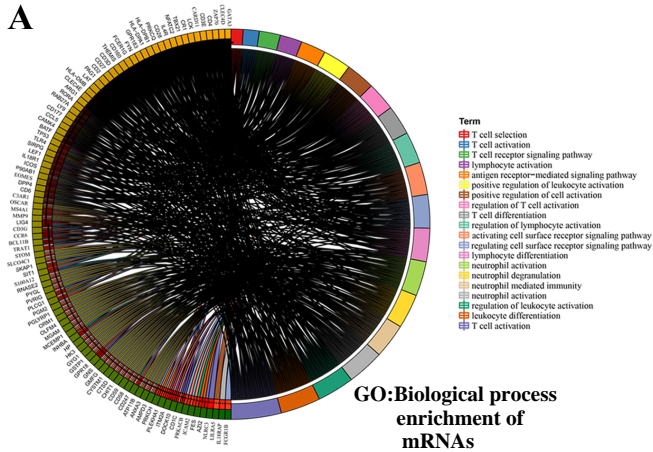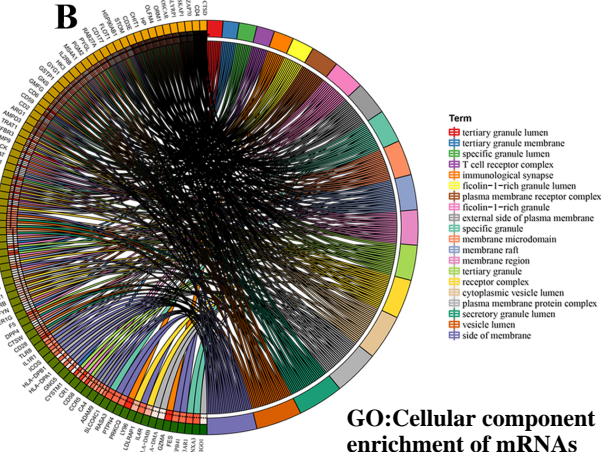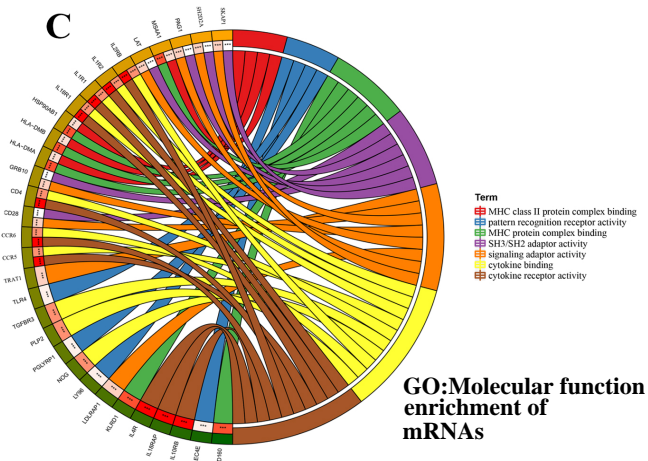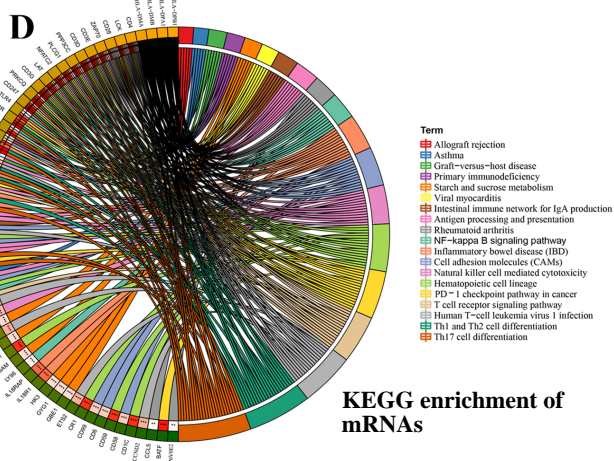

**Figure S3.** GO and KEGG enrichment analysis. A :Biological process enrichment of mRNAs. B :Cellular component enrichment of mRNAs. C: Molecular function enrichment of mRNAs. D: KEGG enrichment of mRNAs.

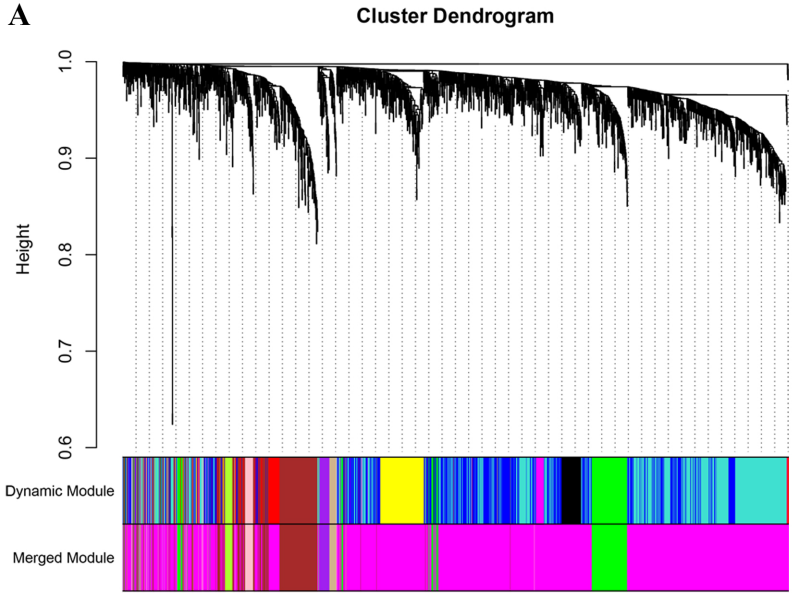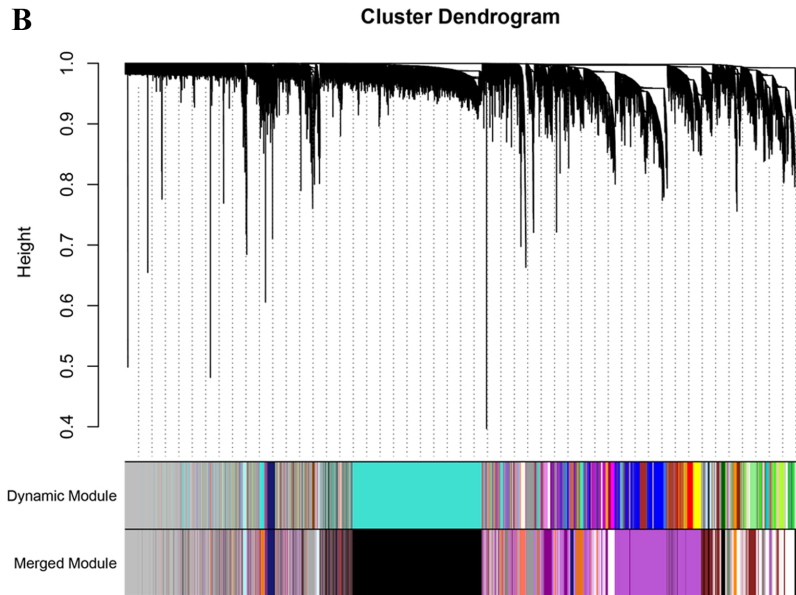

**Figure S4. A:**Dendrogram of all differentially expressed lncRNAs clustered based on a dissimilarity measure; **B:**Dendrogram of all differentially expressed mRNAs clustered based on a dissimilarity measure.



**A**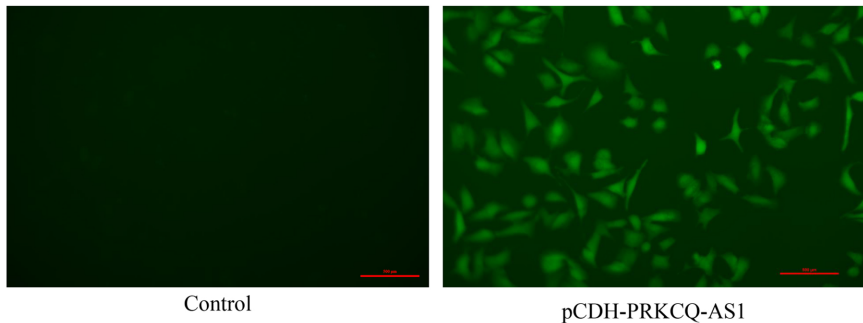**B**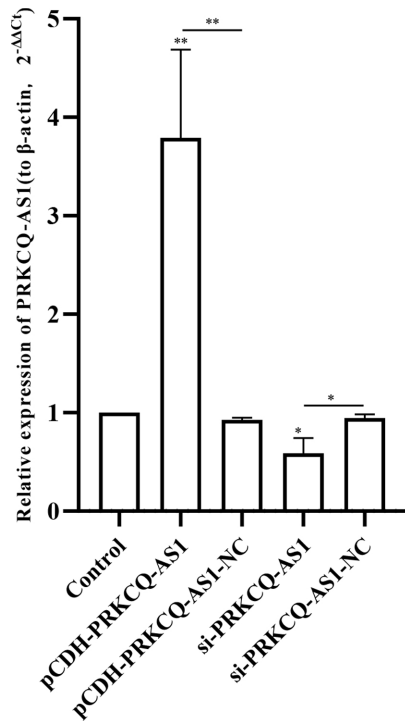

**Figure S5:** Transfection efficiency of PRKCQ-AS1 plasmid. **A:**The transfection efficiency was detected by fluorescence microscopy. **B:**The transfection efficiency was detected by RT-qPCR. \*\*  $p < 0.01$ . \*  $p < 0.05$ .

## ENST00000663449.1 lentiviral expression plasmid

### Result analysis report

#### Sequencing analysis

The sequencing results are as follows: **yellow** is the target sequence, **green** is the restriction sites.

```
CCCGGGGAGTTAATAAGCAGAGCTCGTTTAGTGAACCGTCAGATCGCCTGGAGACGCCATCCACGCTGTTTTGACCTCCAT
AGAAGATTCTAGAGCTAGCGAATTCACCTGTGCGCCAGCTGCGAACTGGAGCGGGAGGCGGCGGCCGGAGGGCCAGGA
CAGCCCCGGGAGGGCGGCGAGGCGGAGCAGGAGCGCCCCGGCTCCGGCCACATTCTCAGAGTCAGGAAAAGGGGCGA
GAGGCCACATGTCTCCCTCTCGCCCACTGAAAACGAAACGGCGCTCCAGCAGATTGGGTGGAAAGAGCTGGGTCTCTTT
TCTCTGTTTTTACGCTAGAAAGGGCTTGAAACATTGTTCTTTTAAAATGACCTACCCAGGCATTTGTTGGGCACACTT
CTGTCTGGGGTCATCGTTCCTAGGTGGCTTCGGACCTGGGACTTTTCTGTATCTGCACATTGTCGTTTTATACACAATTGC
CAAGTGGGACTGCTTCACTTTACTGTGCTTGAAGCTGCAAAGTTCTGCCCTGATGTTTCTGGAATAATGCTGAGGAC
TGCCTTTCGGGTAGCCGCCCTATTCACTTCATCTCGGAAATACCTGACCCCTGCCTTGGATCCAGCGGCCCTCCTG
AGAGCTGAGGAAGGAGGAAATCCTATGTGTCTGCTCCCGGAGCTGCCACAACCCATCTTCCACAACCTCGGAACTTGAAA
AAGGAACCCAGGACACGACTTTGCTTTTCTTTGGACCTAGTTGGTGATTATACTCTGTCTCCCATGGAGACCACGTCTTGC
ATCCTTCTTCTATATGGGATTTAGGATAGAAATTAAGAAACATATTATTTGAGTCTTGATTTGGAGAAAGGTAGTATTCA
GGAGGAAGTAGGCTATGATACACATAGAAAATTTGAGGACAGTGTTACTTAACAAGGACATTTCTGTCTCTGCAGAAGTCACA
GCTTGGAGGAAACCAGTTTGCATATTTGATGAGGAATTTGGCCACCAAACCACTGATACTTTCCCAAAGGTTTGGCAGAAA
TTGTTTTTTGAGTGGCTCACCAGAGTACCCAGAAGAATCAGTATGGAATTAGAGGACAGTGGCCTACCCTAAATAAAGACATG
AGTGATGTATAAAGTCTAGTGTCAATTTATTGAGAAAATATCAAAATTTCTGGGAGCTATGGGTCAAAGTTGATAGGCACAAA
CAAACAAAACGAAAGGTATTTTAAATTCACAGCTTGGATAAGTAAAAGGGAGATGTTGTCATTTCTCTTCTTCAATCCAACCTT
TAGATTTTCAAGCCGGAAGGTAATTAGAAGTTAGAAATGTTATTGCCAGAAAATAGCTCTAAACCTGAAAAAAAAAAAA
AAAAAAAAAAAAAAAAACTGACCCTCCTCTTGGGGAGTGATAAACCTCAATTACTGTTGATAGTAAAACCTGATATCAACTCTTCGAA
ACCAGTGAAAGGTGAATGGAAACCTTACCCTAGGTAAAGTTTAAAAATGTTCATAATATATTTGAAAGTTCCATTATTTAA
AATATTCATTAGACATGCTTTGTAATGTTAAGTTACTTCAAAAAATCTTACACAAGGGAAGGGAAGTATGTATTATTCTTCATTT
AAGAGAAAAGATAATGTGTGAATATTAGTTAATATTTATCGTACATTTACTACCTGTGTGCGAAGCGTAGTGTTACACACTTAATTC
AATTATTTAATTTGATTCTAACAATGAATCCCCTGAGATGGATAATATCCTCTTCATTTTACAGATGAGACAATTGAGACTTAAAG
GTTAAACAAATGATTTCTAAGCTCATTGAGCTAATAAACGGTAGGGGACTGCTTGACACCAGTCCAGTTGACCCTCAAATCC
ATGATTTCTGCCACCATATTCACAGAAACAAGACAAGAGCTGAAAATATAGCCTGACTCTTGAAACAGTCAAAGAATTGTGTAT
GTTTATGAAAGTTCTGATTAATAAGATATTCTGAGGACAAAAGACAAGGCATGGGTAGAGGGGCAATGTGTAGATTAGAATGTA
TCACAATGCCCACTAAATAGTAAAACCATAGAAAATGAAATTTAATCCTTACTGTGTAGAATATTTAGAGTAGATTGTTTTTGCG
GCCGCGAAGGATCTGCGATTGCTCCCGGCCACGGGTTT
```

**Supplementary Material 2:** Sequencing analysis report of the target fragment (PRKCQ-AS1(ENST000000663449)) in si-PRKCQ-AS1.

**Sequence Report of siRNA**

| Product ID                 | Product Name                    | Target sequence            |
|----------------------------|---------------------------------|----------------------------|
| <b>siG2112090133416159</b> | <b>si-h-ENST00000663449_001</b> | <b>ACTGTGCTTGAAGCTGCAA</b> |
| <b>siG2112090133417251</b> | <b>si-h-ENST00000663449_002</b> | <b>GAAGTCACAGCTTGGAGGA</b> |
| <b>siG2112090133418343</b> | <b>si-h-ENST00000663449_003</b> | <b>ACAGATGAGACAATTGAGA</b> |
| <b>siG2112090133419435</b> | <b>si-h-ENST00000646820_001</b> | <b>CCACATTGCTTATCTCTTT</b> |
| <b>siG2112090133420527</b> | <b>si-h-ENST00000646820_002</b> | <b>CCCACCTTACGTATGTGAA</b> |
| <b>siG2112090133421619</b> | <b>si-h-ENST00000646820_003</b> | <b>CTCAAACCTCAACAACAAA</b> |

**Table S1.**Information on clinical samples

| <b>Organism</b> | <b>Source</b>             | <b>sample id</b> | <b>age</b> | <b>gender</b> | <b>Sequence ID</b> | <b>Notes</b> |
|-----------------|---------------------------|------------------|------------|---------------|--------------------|--------------|
| Homo sapiens    | Peripheral blood, sepsis  | HB016503         | 65         | FEMALE        | GP1_1              | For Sequence |
| Homo sapiens    | Peripheral blood, sepsis  | HB016733         | 68         | FEMALE        | GP1_2              |              |
| Homo sapiens    | Peripheral blood, sepsis  | HB016995         | 75         | MALE          | GP1_3              |              |
| Homo sapiens    | Peripheral blood, sepsis  | HB017859         | 76         | MALE          | GP1_4              |              |
| Homo sapiens    | Peripheral blood, sepsis  | HB014599-R       | 85         | FEMALE        | /                  | For qPCR     |
| Homo sapiens    | Peripheral blood, sepsis  | HB016053         | 33         | MALE          | /                  |              |
| Homo sapiens    | Peripheral blood, sepsis  | HB016054         | 34         | MALE          | /                  |              |
| Homo sapiens    | Peripheral blood, sepsis  | HB016996         | 75         | MALE          | /                  |              |
| Homo sapiens    | Peripheral blood, sepsis  | HB017711         | 79         | MALE          | /                  |              |
| Homo sapiens    | Peripheral blood, sepsis  | HB017859         | 78         | FEMALE        | /                  |              |
| Homo sapiens    | Peripheral blood, sepsis  | HB017860         | 88         | FEMALE        | /                  |              |
| Homo sapiens    | Peripheral blood, sepsis  | HB019203         | 65         | FEMALE        | /                  |              |
| Homo sapiens    | Peripheral blood, sepsis  | HB020407         | 57         | MALE          | /                  |              |
| Homo sapiens    | Peripheral blood, sepsis  | HB020408         | 68         | MALE          | /                  |              |
| Homo sapiens    | Peripheral blood, sepsis  | HB020584         | 49         | MALE          | /                  |              |
| Homo sapiens    | Peripheral blood, sepsis  | HB020585         | 52         | MALE          | /                  |              |
| Homo sapiens    | Peripheral blood, sepsis  | HB021343         | 82         | MALE          | /                  |              |
| Homo sapiens    | Peripheral blood, sepsis  | HB021344         | 77         | FEMALE        | /                  |              |
| Homo sapiens    | Peripheral blood, sepsis  | HB021345         | 76         | FEMALE        | /                  |              |
| Homo sapiens    | Peripheral blood, control | HB018651         | 66         | FEMALE        | GP2_1              | For Sequence |
| Homo sapiens    | Peripheral blood, control | HB018652         | 45         | FEMALE        | GP2_2              |              |
| Homo sapiens    | Peripheral blood, control | HB018653         | 55         | MALE          | GP2_3              |              |
| Homo sapiens    | Peripheral blood, control | HB018657         | 58         | MALE          | GP2_4              |              |
| Homo sapiens    | Peripheral blood, control | HB012517         | 55         | MALE          | /                  | For qPCR     |
| Homo sapiens    | Peripheral blood, control | HB010907         | 54         | MALE          | /                  |              |
| Homo sapiens    | Peripheral blood, control | HB010948         | 30         | MALE          | /                  |              |
| Homo sapiens    | Peripheral blood, control | HB010975         | 41         | MALE          | /                  |              |
| Homo sapiens    | Peripheral blood, control | HB011054         | 43         | MALE          | /                  |              |
| Homo sapiens    | Peripheral blood, control | HB011041         | 48         | FEMALE        | /                  |              |
| Homo sapiens    | Peripheral blood, control | HB011013         | 59         | MALE          | /                  |              |
| Homo sapiens    | Peripheral blood, control | HB011024         | 39         | MALE          | /                  |              |
| Homo sapiens    | Peripheral blood, control | HB011147         | 66         | MALE          | /                  |              |
| Homo sapiens    | Peripheral blood, control | HB011199         | 32         | MALE          | /                  |              |
| Homo sapiens    | Peripheral blood, control | HB011284         | 53         | FEMALE        | /                  |              |
| Homo sapiens    | Peripheral blood, control | HB011317         | 55         | MALE          | /                  |              |
| Homo sapiens    | Peripheral blood, control | HB011328         | 58         | MALE          | /                  |              |
| Homo sapiens    | Peripheral blood, control | HB012710         | 54         | MALE          | /                  |              |
| Homo sapiens    | Peripheral blood, control | HB011446         | 53         | MALE          | /                  |              |

**Table S2.** The sequences of primers.

| <b>Gene symbol</b> | <b>Primer</b>  | <b>Sequences (5'-3')</b> |
|--------------------|----------------|--------------------------|
| PRKCQ-AS1          | Forward primer | TGGAGACCACGTCTTGCATC     |
|                    | Reverse primer | GGTACTCTGGTGAGCCACTC     |
| Bax                | Forward primer | TACTTTGCCAGCAAACCTGG     |
|                    | Reverse primer | ATGGTTCTGATCAGTTCCG      |
| Bcl-2              | Forward primer | GGATGCCTTTGTGGAACCTG     |
|                    | Reverse primer | GTCTTCAGAGACAGCCAGG      |
| caspase1           | Forward primer | TGGAGACATCCCACAATGG      |
|                    | Reverse primer | TCTCTTCACTTCCTATGAGA     |
| NLRP3              | Forward primer | AACACTCTCGGAGACAAGG      |
|                    | Reverse primer | TGCAGTTGTCTAATTCCAACAC   |
| IL-1 $\beta$       | Forward primer | ATTGCTCAAGTGTCTGAAGC     |
|                    | Reverse primer | ACAAGTCATCCTCATTGCCA     |
| GAPDH              | Forward primer | CATTTCCTGGTATGACAACGA    |
|                    | Reverse primer | GGGTCTTACTCCTTGGAGG      |
| $\beta$ -actin     | Forward primer | GGATTACAGCTCACCATGG      |
|                    | Reverse primer | ATAGGAATCCTTCTGACCCA     |
